# Supplementary material for: Time Series Analysis and Forecasting with Automated Machine Learning on a National ICD-10 Database
Source: MDPI journal article supplement (doi:10.3390/ijerph17144979), 2020-07-10
Supplement: s1 [file s1]

# Flowchart of selection of the study sample

Initial feature setup of the Romanian national ICD-10 database of all hospitalised patients:

|                                   |                                            |                       |                                 |                                       |                                 |                             |                             |                             |
|-----------------------------------|--------------------------------------------|-----------------------|---------------------------------|---------------------------------------|---------------------------------|-----------------------------|-----------------------------|-----------------------------|
| Case ID                           | Hospital ID (encrypted)                    | Admission date        | Admission Type ID               | Admission criteria ID                 | Admission ward ID               | Discharge date              | Type of discharge ID        | State of discharge          |
| Discharge ward ID                 | National Identification number (encrypted) | Age                   | Sex                             | Weight at Admission ID                | Education level ID              | Occupation ID               | Citizenship ID              | Insurance Type ID           |
| National Health Insurance Type ID | Medical Specialist ID                      | Admission ICD-10 code | Principal diagnosis ICD-10 code | Other principal diagnosis ICD-10 code | Secondary diagnosis ICD-10 code | Code of principal procedure | Code of secondary procedure | Date of principal procedure |
| Accident ID                       | Insurance Validation ID                    | DRG                   | Relative value                  | NUTS region of hospital               | NUTS region of patient          | Acute                       |                             |                             |

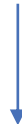

Selection of ICD-10 codes for the ten deadliest diseases:  
(see Supplementary Table 1)

Ischaemic heart disease, Stroke, Chronic obstructive pulmonary disease, Lower respiratory infections, Alzheimer disease, Lung cancer, Diabetes mellitus, Road injury, Diarrhoeal diseases, Tuberculosis

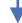

Extraction of ICD-10 codes of the ten deadliest diseases

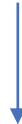

Selection of necessary features to create a secondary time series database:

|                                   |                                            |                       |                                 |                                       |                                 |                             |                             |                             |
|-----------------------------------|--------------------------------------------|-----------------------|---------------------------------|---------------------------------------|---------------------------------|-----------------------------|-----------------------------|-----------------------------|
| Case ID                           | Hospital ID (encrypted)                    | Admission date        | Admission Type ID               | Admission criteria ID                 | Admission ward ID               | Discharge date              | Type of discharge ID        | State of discharge          |
| Discharge ward ID                 | National Identification number (encrypted) | Age                   | Sex                             | Weight at Admission ID                | Education level ID              | Occupation ID               | Citizenship ID              | Insurance Type ID           |
| National Health Insurance Type ID | Medical Specialist ID                      | Admission ICD-10 code | Principal diagnosis ICD-10 code | Other principal diagnosis ICD-10 code | Secondary diagnosis ICD-10 code | Code of principal procedure | Code of secondary procedure | Date of principal procedure |
| Accident ID                       | Insurance Validation ID                    | DRG                   | Relative value                  | NUTS region of hospital               | NUTS region of patient          | Acute                       |                             |                             |

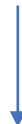

Preparation of secondary time series database for autoML analysis with model selection and prediction:

|       |                    |           |
|-------|--------------------|-----------|
| Dates | Disease-NUTS-2 Key | New cases |
|-------|--------------------|-----------|

Figure S1.

## A Ischaemic heart diseases

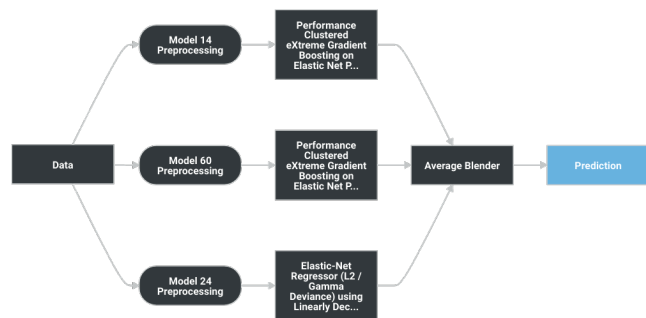

## F Lung cancer

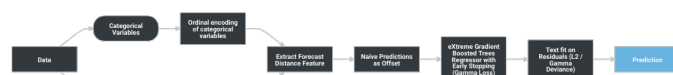

## B Stroke

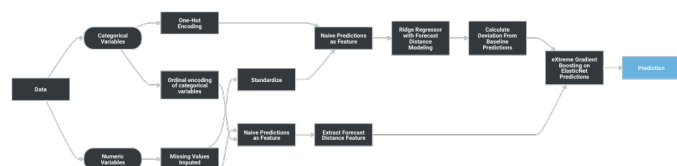

## G Diabetes mellitus

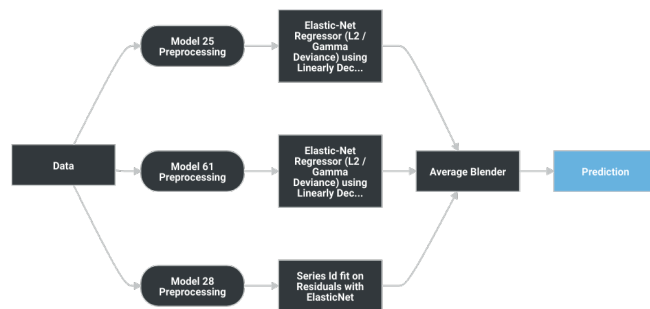

## C Chronic obstructive pulmonary disease

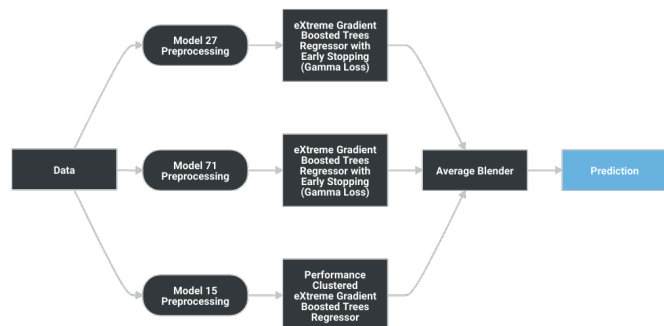

## H Road injuries

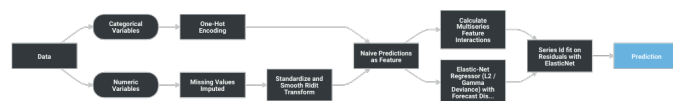

## D Lower respiratory infections

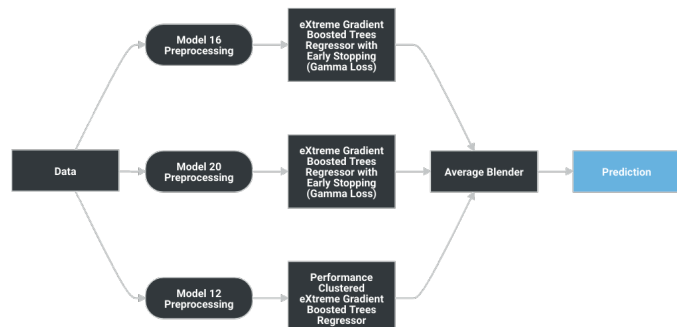

## I Diarrhoeal diseases

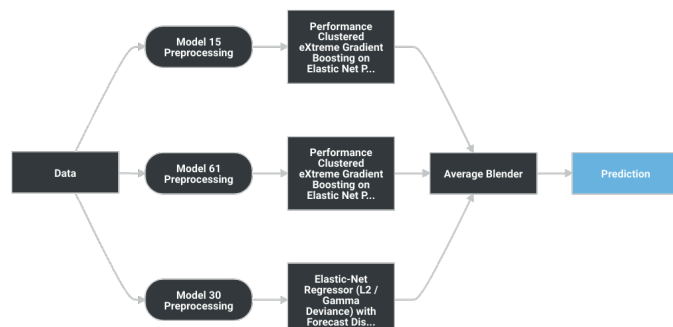

## E Alzheimer's disease

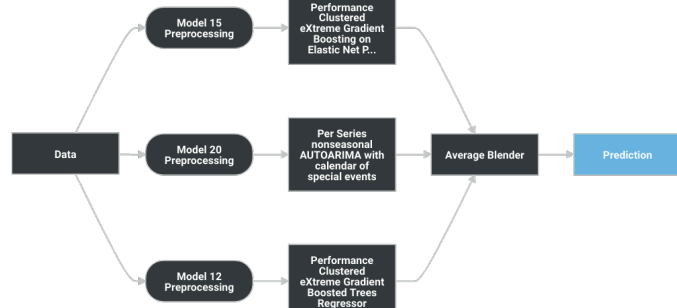

## J Tuberculosis

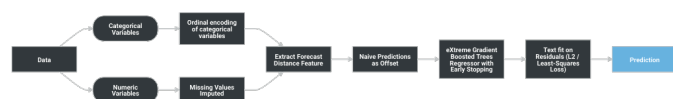

Figure S2.



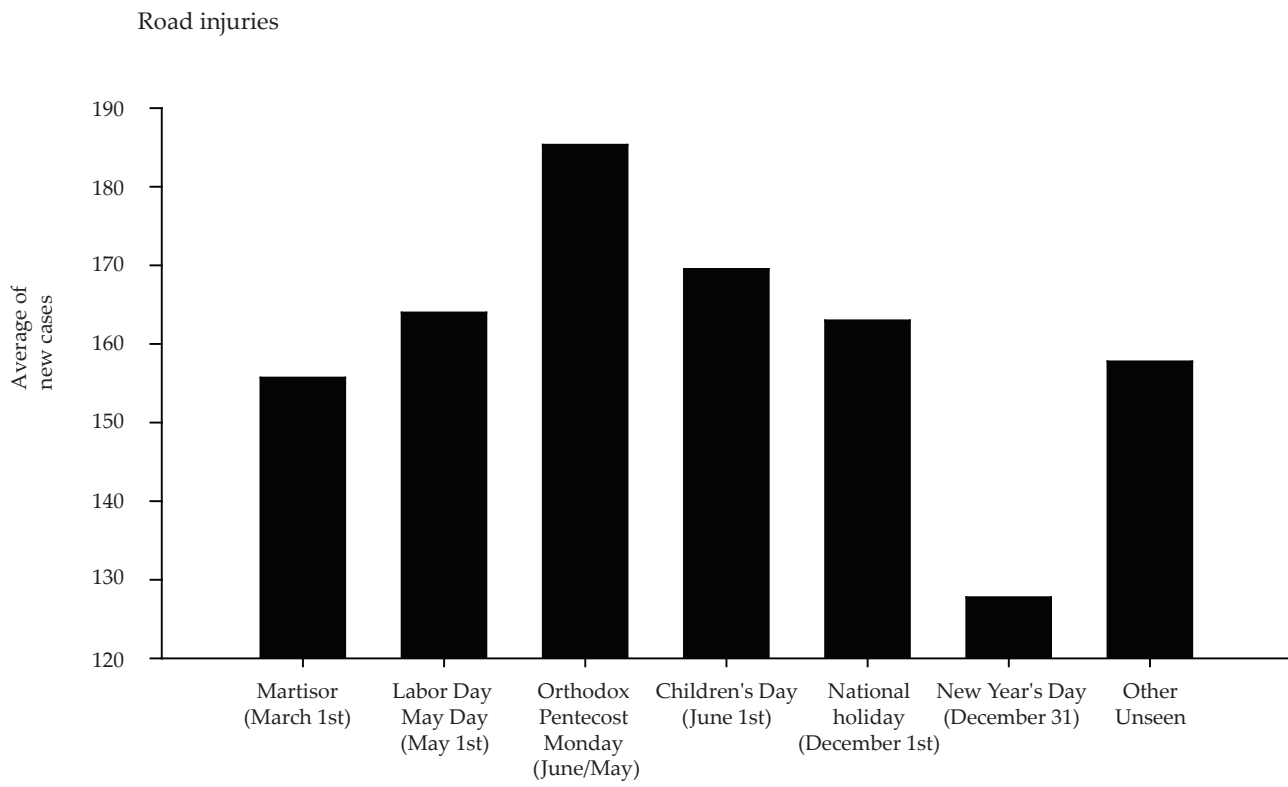

Figure S4.
