# Supplementary material for: Time Series Analysis and Forecasting with Automated Machine Learning on a National ICD-10 Database
Source: Int J Environ Res Public Health. 2020 Jul 10;17(14):4979. doi: 10.3390/ijerph17144979 (PMC7400312; doi:10.3390/ijerph17144979)
Supplement: Supplementary file 1 [file ijerph-17-04979-s001.zip]

Archive with 6 entries (6 files):
- ijerph-836444 - Table S4.docx
- ijerph-836444 - Table S5.docx
- ijerph-836444 - Table S1.xlsx
- ijerph-836444 - Table S2.xlsx
- ijerph-836444 - Table S3.docx
- ijerph-836444 - suppl. figures final.pdf
