# Supplementary material for: Time Series Analysis and Forecasting with Automated Machine Learning on a National ICD-10 Database
Source: Int J Environ Res Public Health. 2020 Jul 10;17(14):4979. doi: 10.3390/ijerph17144979 (PMC7400312; doi:10.3390/ijerph17144979)
Supplement: Supplementary file 1 [file ijerph-17-04979-s001.zip › ijerph-836444 - Table S1.xlsx]

## Sheet: Mapping Diseases to ICD10
Disease	ICD_10_code		Disease	ICD_10_code		Disease	ICD_10_code		Disease	ICD_10_code		Disease	ICD_10_code		Disease	ICD_10_code		Disease	ICD_10_code		Disease	ICD_10_code		Disease	ICD_10_code		Disease	ICD_10_code
Ischaemic heart disease	I20.0		Stroke	I60.0		Chronic obstructive pulmonary disease	J44.0		Lower respiratory infections	J10.0		Alzheimerˈs disease	G30.0		Lung cancer	C34.0		Diabetes mellitus	E10.0		Road Injury	V01.0		Diarrhoeal diseases	A00.0		Tuberculosis	A15.0
Ischaemic heart disease	I20.1		Stroke	I60.1		Chronic obstructive pulmonary disease	J44.1		Lower respiratory infections	J11.0		Alzheimerˈs disease	G30.1		Lung cancer	C34.1		Diabetes mellitus	E10.01		Road Injury	V01.1		Diarrhoeal diseases	A00.1		Tuberculosis	A15.1
Ischaemic heart disease	I20.8		Stroke	I60.2		Chronic obstructive pulmonary disease	J44.8		Lower respiratory infections	J12.0		Alzheimerˈs disease	G30.8		Lung cancer	C34.2		Diabetes mellitus	E10.11		Road Injury	V01.9		Diarrhoeal diseases	A00.9		Tuberculosis	A15.2
Ischaemic heart disease	I20.9		Stroke	I60.3		Chronic obstructive pulmonary disease	J44.9		Lower respiratory infections	J12.1		Alzheimerˈs disease	G30.9		Lung cancer	C34.3		Diabetes mellitus	E10.12		Road Injury	V02.0		Diarrhoeal diseases	A01.0		Tuberculosis	A15.3
Ischaemic heart disease	I21.0		Stroke	I60.4					Lower respiratory infections	J12.2		Alzheimerˈs disease	F00.0		Lung cancer	C34.8		Diabetes mellitus	E10.13		Road Injury	V02.1		Diarrhoeal diseases	A01.1		Tuberculosis	A15.4
Ischaemic heart disease	I21.1		Stroke	I60.5					Lower respiratory infections	J12.3		Alzheimerˈs disease	F00.1		Lung cancer	C34.9		Diabetes mellitus	E10.14		Road Injury	V02.9		Diarrhoeal diseases	A01.2		Tuberculosis	A15.5
Ischaemic heart disease	I21.2		Stroke	I60.6					Lower respiratory infections	J12.8		Alzheimerˈs disease	F00.2		Lung cancer	C78.0		Diabetes mellitus	E10.15		Road Injury	V03.0		Diarrhoeal diseases	A01.3		Tuberculosis	A15.6
Ischaemic heart disease	I21.3		Stroke	I60.7					Lower respiratory infections	J12.9		Alzheimerˈs disease	F00.9					Diabetes mellitus	E10.16		Road Injury	V03.1		Diarrhoeal diseases	A01.4		Tuberculosis	A15.7
Ischaemic heart disease	I21.4		Stroke	I60.8					Lower respiratory infections	J13								Diabetes mellitus	E10.21		Road Injury	V03.9		Diarrhoeal diseases	A02.0		Tuberculosis	A15.8
Ischaemic heart disease	I21.9		Stroke	I60.9					Lower respiratory infections	J14								Diabetes mellitus	E10.22		Road Injury	V04.0		Diarrhoeal diseases	A02.1		Tuberculosis	A15.9
Ischaemic heart disease	I22.0		Stroke	I61.0					Lower respiratory infections	J15.0								Diabetes mellitus	E10.23		Road Injury	V04.1		Diarrhoeal diseases	A02.2		Tuberculosis	A16.0
Ischaemic heart disease	I22.1		Stroke	I61.1					Lower respiratory infections	J15.1								Diabetes mellitus	E10.29		Road Injury	V04.9		Diarrhoeal diseases	A02.8		Tuberculosis	A16.1
Ischaemic heart disease	I22.8		Stroke	I61.2					Lower respiratory infections	J15.2								Diabetes mellitus	E10.31		Road Injury	V05.0		Diarrhoeal diseases	A02.9		Tuberculosis	A16.2
Ischaemic heart disease	I22.9		Stroke	I61.3					Lower respiratory infections	J15.3								Diabetes mellitus	E10.32		Road Injury	V05.1		Diarrhoeal diseases	A03.0		Tuberculosis	A16.3
Ischaemic heart disease	I23.0		Stroke	I61.4					Lower respiratory infections	J15.4								Diabetes mellitus	E10.33		Road Injury	V05.9		Diarrhoeal diseases	A03.1		Tuberculosis	A16.4
Ischaemic heart disease	I23.1		Stroke	I61.5					Lower respiratory infections	J15.5								Diabetes mellitus	E10.34		Road Injury	V06.0		Diarrhoeal diseases	A03.2		Tuberculosis	A16.5
Ischaemic heart disease	I23.2		Stroke	I61.6					Lower respiratory infections	J15.6								Diabetes mellitus	E10.35		Road Injury	V06.1		Diarrhoeal diseases	A03.3		Tuberculosis	A16.6
Ischaemic heart disease	I23.3		Stroke	I61.8					Lower respiratory infections	J15.7								Diabetes mellitus	E10.36		Road Injury	V06.9		Diarrhoeal diseases	A03.8		Tuberculosis	A16.7
Ischaemic heart disease	I23.4		Stroke	I61.9					Lower respiratory infections	J15.8								Diabetes mellitus	E10.39		Road Injury	V09.0		Diarrhoeal diseases	A03.9		Tuberculosis	A16.8
Ischaemic heart disease	I23.5		Stroke	I62.0					Lower respiratory infections	J15.9								Diabetes mellitus	E10.40		Road Injury	V09.1		Diarrhoeal diseases	A04.0		Tuberculosis	A16.9
Ischaemic heart disease	I23.6		Stroke	I62.1					Lower respiratory infections	J16.0								Diabetes mellitus	E10.41		Road Injury	V09.2		Diarrhoeal diseases	A04.1		Tuberculosis	A17.0
Ischaemic heart disease	I23.8		Stroke	I62.9					Lower respiratory infections	J16.8								Diabetes mellitus	E10.42		Road Injury	V09.3		Diarrhoeal diseases	A04.2		Tuberculosis	A17.1
Ischaemic heart disease	I24.0		Stroke	I63.0					Lower respiratory infections	J17.0								Diabetes mellitus	E10.43		Road Injury	V09.9		Diarrhoeal diseases	A04.3		Tuberculosis	A17.8
Ischaemic heart disease	I24.1		Stroke	I63.1					Lower respiratory infections	J17.1								Diabetes mellitus	E10.49		Road Injury	V10.0		Diarrhoeal diseases	A04.4		Tuberculosis	A17.9
Ischaemic heart disease	I24.8		Stroke	I63.2					Lower respiratory infections	J17.2								Diabetes mellitus	E10.51		Road Injury	V10.1		Diarrhoeal diseases	A04.5		Tuberculosis	A18.0
Ischaemic heart disease	I24.9		Stroke	I63.3					Lower respiratory infections	J17.3								Diabetes mellitus	E10.52		Road Injury	V10.2		Diarrhoeal diseases	A04.6		Tuberculosis	A18.1
Ischaemic heart disease	I25.0		Stroke	I63.4					Lower respiratory infections	J17.8								Diabetes mellitus	E10.53		Road Injury	V10.3		Diarrhoeal diseases	A04.7		Tuberculosis	A18.2
Ischaemic heart disease	I25.10		Stroke	I63.5					Lower respiratory infections	J18.0								Diabetes mellitus	E10.61		Road Injury	V10.4		Diarrhoeal diseases	A04.8		Tuberculosis	A18.3
Ischaemic heart disease	I25.11		Stroke	I63.6					Lower respiratory infections	J18.1								Diabetes mellitus	E10.62		Road Injury	V10.5		Diarrhoeal diseases	A04.9		Tuberculosis	A18.4
Ischaemic heart disease	I25.12		Stroke	I63.8					Lower respiratory infections	J18.2								Diabetes mellitus	E10.63		Road Injury	V10.9		Diarrhoeal diseases	A05.0		Tuberculosis	A18.5
Ischaemic heart disease	I25.13		Stroke	I63.9					Lower respiratory infections	J18.8								Diabetes mellitus	E10.64		Road Injury	V11.0		Diarrhoeal diseases	A05.1		Tuberculosis	A18.6
Ischaemic heart disease	I25.2		Stroke	I64					Lower respiratory infections	J18.9								Diabetes mellitus	E10.65		Road Injury	V11.1		Diarrhoeal diseases	A05.2		Tuberculosis	A18.7
Ischaemic heart disease	I25.3								Lower respiratory infections	J20.0								Diabetes mellitus	E10.69		Road Injury	V11.2		Diarrhoeal diseases	A05.3		Tuberculosis	A18.8
Ischaemic heart disease	I25.4								Lower respiratory infections	J20.1								Diabetes mellitus	E10.71		Road Injury	V11.3		Diarrhoeal diseases	A05.4		Tuberculosis	A19.0
Ischaemic heart disease	I25.5								Lower respiratory infections	J20.2								Diabetes mellitus	E10.73		Road Injury	V11.4		Diarrhoeal diseases	A05.8		Tuberculosis	A19.1
Ischaemic heart disease	I25.6								Lower respiratory infections	J20.3								Diabetes mellitus	E10.8		Road Injury	V11.5		Diarrhoeal diseases	A05.9		Tuberculosis	A19.2
Ischaemic heart disease	I25.8								Lower respiratory infections	J20.4								Diabetes mellitus	E10.9		Road Injury	V11.9		Diarrhoeal diseases	A06.0		Tuberculosis	A19.8
Ischaemic heart disease	I25.9								Lower respiratory infections	J20.5								Diabetes mellitus	E11.01		Road Injury	V12.0		Diarrhoeal diseases	A06.1		Tuberculosis	A19.9
									Lower respiratory infections	J20.6								Diabetes mellitus	E11.02		Road Injury	V12.1		Diarrhoeal diseases	A06.2		Tuberculosis	B90.0
									Lower respiratory infections	J20.7								Diabetes mellitus	E11.11		Road Injury	V12.2		Diarrhoeal diseases	A06.3		Tuberculosis	B90.1
									Lower respiratory infections	J20.8								Diabetes mellitus	E11.12		Road Injury	V12.3		Diarrhoeal diseases	A06.4		Tuberculosis	B90.2
									Lower respiratory infections	J20.9								Diabetes mellitus	E11.13		Road Injury	V12.4		Diarrhoeal diseases	A06.5		Tuberculosis	B90.8
									Lower respiratory infections	J21.0								Diabetes mellitus	E11.14		Road Injury	V12.5		Diarrhoeal diseases	A06.6		Tuberculosis	B90.9
									Lower respiratory infections	J21.1								Diabetes mellitus	E11.15		Road Injury	V12.9		Diarrhoeal diseases	A06.7		Tuberculosis	K23.0
									Lower respiratory infections	J21.8								Diabetes mellitus	E11.16		Road Injury	V13.0		Diarrhoeal diseases	A06.8		Tuberculosis	K67.3
									Lower respiratory infections	J21.9								Diabetes mellitus	E11.21		Road Injury	V13.1		Diarrhoeal diseases	A06.9		Tuberculosis	M01.10
									Lower respiratory infections	J22								Diabetes mellitus	E11.22		Road Injury	V13.2		Diarrhoeal diseases	A07.0		Tuberculosis	M01.11
																		Diabetes mellitus	E11.23		Road Injury	V13.3		Diarrhoeal diseases	A07.1		Tuberculosis	M01.12
																		Diabetes mellitus	E11.29		Road Injury	V13.4		Diarrhoeal diseases	A07.2		Tuberculosis	M01.13
																		Diabetes mellitus	E11.31		Road Injury	V13.5		Diarrhoeal diseases	A07.3		Tuberculosis	M01.14
																		Diabetes mellitus	E11.32		Road Injury	V13.9		Diarrhoeal diseases	A07.8		Tuberculosis	M01.15
																		Diabetes mellitus	E11.33		Road Injury	V14.0		Diarrhoeal diseases	A07.9		Tuberculosis	M01.16
																		Diabetes mellitus	E11.34		Road Injury	V14.1		Diarrhoeal diseases	A08.0		Tuberculosis	M01.17
																		Diabetes mellitus	E11.35		Road Injury	V14.2		Diarrhoeal diseases	A08.1		Tuberculosis	M01.18
																		Diabetes mellitus	E11.36		Road Injury	V14.3		Diarrhoeal diseases	A08.2		Tuberculosis	M01.19
																		Diabetes mellitus	E11.39		Road Injury	V14.4		Diarrhoeal diseases	A08.3		Tuberculosis	M49.00
																		Diabetes mellitus	E11.40		Road Injury	V14.5		Diarrhoeal diseases	A08.4		Tuberculosis	M49.01
																		Diabetes mellitus	E11.41		Road Injury	V14.9		Diarrhoeal diseases	A08.5		Tuberculosis	M49.02
																		Diabetes mellitus	E11.42		Road Injury	V15.0		Diarrhoeal diseases	A09		Tuberculosis	M49.03
																		Diabetes mellitus	E11.43		Road Injury	V15.1		Diarrhoeal diseases	K50.0		Tuberculosis	M49.04
																		Diabetes mellitus	E11.49		Road Injury	V15.2		Diarrhoeal diseases	K50.1		Tuberculosis	M49.05
																		Diabetes mellitus	E11.51		Road Injury	V15.3		Diarrhoeal diseases	K50.8		Tuberculosis	M49.06
																		Diabetes mellitus	E11.52		Road Injury	V15.4		Diarrhoeal diseases	K50.9		Tuberculosis	M49.07
																		Diabetes mellitus	E11.53		Road Injury	V15.5		Diarrhoeal diseases	K51.0		Tuberculosis	M49.08
																		Diabetes mellitus	E11.61		Road Injury	V15.9		Diarrhoeal diseases	K51.1		Tuberculosis	M49.09
																		Diabetes mellitus	E11.62		Road Injury	V16.0		Diarrhoeal diseases	K51.2		Tuberculosis	M90.00
																		Diabetes mellitus	E11.63		Road Injury	V16.1		Diarrhoeal diseases	K51.3		Tuberculosis	M90.01
																		Diabetes mellitus	E11.64		Road Injury	V16.2		Diarrhoeal diseases	K51.4		Tuberculosis	M90.02
																		Diabetes mellitus	E11.65		Road Injury	V16.3		Diarrhoeal diseases	K51.5		Tuberculosis	M90.03
																		Diabetes mellitus	E11.69		Road Injury	V16.4		Diarrhoeal diseases	K51.8		Tuberculosis	M90.04
																		Diabetes mellitus	E11.71		Road Injury	V16.5		Diarrhoeal diseases	K51.9		Tuberculosis	M90.05
																		Diabetes mellitus	E11.72		Road Injury	V16.9		Diarrhoeal diseases	K52.0		Tuberculosis	M90.06
																		Diabetes mellitus	E11.73		Road Injury	V17.0		Diarrhoeal diseases	K52.1		Tuberculosis	M90.07
																		Diabetes mellitus	E11.8		Road Injury	V17.1		Diarrhoeal diseases	K52.2		Tuberculosis	M90.08
																		Diabetes mellitus	E11.9		Road Injury	V17.2		Diarrhoeal diseases	K52.3		Tuberculosis	M90.09
																		Diabetes mellitus	E13.01		Road Injury	V17.3		Diarrhoeal diseases	K52.8		Tuberculosis	N33.0
																		Diabetes mellitus	E13.02		Road Injury	V17.4		Diarrhoeal diseases	K52.9		Tuberculosis	N74.0
																		Diabetes mellitus	E13.11		Road Injury	V17.5		Diarrhoeal diseases	P78.3		Tuberculosis	N74.1
																		Diabetes mellitus	E13.12		Road Injury	V17.9		Diarrhoeal diseases	K58.0		Tuberculosis	O98.0
																		Diabetes mellitus	E13.13		Road Injury	V18.0		Diarrhoeal diseases	K58.9		Tuberculosis	P37.0
																		Diabetes mellitus	E13.14		Road Injury	V18.1		Diarrhoeal diseases	K59.1
																		Diabetes mellitus	E13.15		Road Injury	V18.2		Diarrhoeal diseases	B78.0
																		Diabetes mellitus	E13.16		Road Injury	V18.3		Diarrhoeal diseases	B78.7
																		Diabetes mellitus	E13.21		Road Injury	V18.4		Diarrhoeal diseases	B78.9
																		Diabetes mellitus	E13.22		Road Injury	V18.5
																		Diabetes mellitus	E13.23		Road Injury	V18.9
																		Diabetes mellitus	E13.29		Road Injury	V19.0
																		Diabetes mellitus	E13.31		Road Injury	V19.1
																		Diabetes mellitus	E13.32		Road Injury	V19.2
																		Diabetes mellitus	E13.33		Road Injury	V19.3
																		Diabetes mellitus	E13.34		Road Injury	V19.4
																		Diabetes mellitus	E13.35		Road Injury	V19.5
																		Diabetes mellitus	E13.36		Road Injury	V19.6
																		Diabetes mellitus	E13.39		Road Injury	V19.8
																		Diabetes mellitus	E13.40		Road Injury	V19.9
																		Diabetes mellitus	E13.41		Road Injury	V20.00
																		Diabetes mellitus	E13.42		Road Injury	V20.01
																		Diabetes mellitus	E13.43		Road Injury	V20.02
																		Diabetes mellitus	E13.49		Road Injury	V20.08
																		Diabetes mellitus	E13.51		Road Injury	V20.09
																		Diabetes mellitus	E13.52		Road Injury	V20.10
																		Diabetes mellitus	E13.53		Road Injury	V20.11
																		Diabetes mellitus	E13.61		Road Injury	V20.12
																		Diabetes mellitus	E13.62		Road Injury	V20.18
																		Diabetes mellitus	E13.63		Road Injury	V20.19
																		Diabetes mellitus	E13.64		Road Injury	V20.20
																		Diabetes mellitus	E13.65		Road Injury	V20.21
																		Diabetes mellitus	E13.69		Road Injury	V20.22
																		Diabetes mellitus	E13.71		Road Injury	V20.28
																		Diabetes mellitus	E13.72		Road Injury	V20.29
																		Diabetes mellitus	E13.73		Road Injury	V20.30
																		Diabetes mellitus	E13.8		Road Injury	V20.31
																		Diabetes mellitus	E13.9		Road Injury	V20.32
																		Diabetes mellitus	E14.01		Road Injury	V20.38
																		Diabetes mellitus	E14.02		Road Injury	V20.39
																		Diabetes mellitus	E14.11		Road Injury	V20.40
																		Diabetes mellitus	E14.12		Road Injury	V20.41
																		Diabetes mellitus	E14.13		Road Injury	V20.42
																		Diabetes mellitus	E14.14		Road Injury	V20.48
																		Diabetes mellitus	E14.15		Road Injury	V20.49
																		Diabetes mellitus	E14.16		Road Injury	V20.50
																		Diabetes mellitus	E14.21		Road Injury	V20.51
																		Diabetes mellitus	E14.22		Road Injury	V20.52
																		Diabetes mellitus	E14.23		Road Injury	V20.58
																		Diabetes mellitus	E14.29		Road Injury	V20.59
																		Diabetes mellitus	E14.31		Road Injury	V20.90
																		Diabetes mellitus	E14.32		Road Injury	V20.91
																		Diabetes mellitus	E14.33		Road Injury	V20.92
																		Diabetes mellitus	E14.34		Road Injury	V20.98
																		Diabetes mellitus	E14.35		Road Injury	V20.99
																		Diabetes mellitus	E14.36		Road Injury	V21.00
																		Diabetes mellitus	E14.39		Road Injury	V21.01
																		Diabetes mellitus	E14.40		Road Injury	V21.02
																		Diabetes mellitus	E14.41		Road Injury	V21.08
																		Diabetes mellitus	E14.42		Road Injury	V21.09
																		Diabetes mellitus	E14.43		Road Injury	V21.10
																		Diabetes mellitus	E14.49		Road Injury	V21.11
																		Diabetes mellitus	E14.51		Road Injury	V21.12
																		Diabetes mellitus	E14.52		Road Injury	V21.18
																		Diabetes mellitus	E14.53		Road Injury	V21.19
																		Diabetes mellitus	E14.61		Road Injury	V21.20
																		Diabetes mellitus	E14.62		Road Injury	V21.21
																		Diabetes mellitus	E14.63		Road Injury	V21.22
																		Diabetes mellitus	E14.64		Road Injury	V21.28
																		Diabetes mellitus	E14.65		Road Injury	V21.29
																		Diabetes mellitus	E14.69		Road Injury	V21.30
																		Diabetes mellitus	E14.71		Road Injury	V21.31
																		Diabetes mellitus	E14.72		Road Injury	V21.32
																		Diabetes mellitus	E14.73		Road Injury	V21.38
																		Diabetes mellitus	E14.8		Road Injury	V21.39
																		Diabetes mellitus	E14.9		Road Injury	V21.40
																					Road Injury	V21.41
																					Road Injury	V21.42
																					Road Injury	V21.48
																					Road Injury	V21.49
																					Road Injury	V21.50
																					Road Injury	V21.51
																					Road Injury	V21.52
																					Road Injury	V21.58
																					Road Injury	V21.59
																					Road Injury	V21.90
																					Road Injury	V21.91
																					Road Injury	V21.92
																					Road Injury	V21.98
																					Road Injury	V21.99
																					Road Injury	V22.00
																					Road Injury	V22.01
																					Road Injury	V22.02
																					Road Injury	V22.08
																					Road Injury	V22.09
																					Road Injury	V22.10
																					Road Injury	V22.11
																					Road Injury	V22.12
																					Road Injury	V22.18
																					Road Injury	V22.19
																					Road Injury	V22.20
																					Road Injury	V22.21
																					Road Injury	V22.22
																					Road Injury	V22.28
																					Road Injury	V22.29
																					Road Injury	V22.30
																					Road Injury	V22.31
																					Road Injury	V22.32
																					Road Injury	V22.38
																					Road Injury	V22.39
																					Road Injury	V22.40
																					Road Injury	V22.41
																					Road Injury	V22.42
																					Road Injury	V22.48
																					Road Injury	V22.49
																					Road Injury	V22.50
																					Road Injury	V22.51
																					Road Injury	V22.52
																					Road Injury	V22.58
																					Road Injury	V22.59
																					Road Injury	V22.90
																					Road Injury	V22.91
																					Road Injury	V22.92
																					Road Injury	V22.98
																					Road Injury	V22.99
																					Road Injury	V23.00
																					Road Injury	V23.01
																					Road Injury	V23.02
																					Road Injury	V23.08
																					Road Injury	V23.09
																					Road Injury	V23.10
																					Road Injury	V23.11
																					Road Injury	V23.12
																					Road Injury	V23.18
																					Road Injury	V23.19
																					Road Injury	V23.20
																					Road Injury	V23.21
																					Road Injury	V23.22
																					Road Injury	V23.28
																					Road Injury	V23.29
																					Road Injury	V23.30
																					Road Injury	V23.31
																					Road Injury	V23.32
																					Road Injury	V23.38
																					Road Injury	V23.39
																					Road Injury	V23.40
																					Road Injury	V23.41
																					Road Injury	V23.42
																					Road Injury	V23.48
																					Road Injury	V23.49
																					Road Injury	V23.50
																					Road Injury	V23.51
																					Road Injury	V23.52
																					Road Injury	V23.58
																					Road Injury	V23.59
																					Road Injury	V23.90
																					Road Injury	V23.91
																					Road Injury	V23.92
																					Road Injury	V23.98
																					Road Injury	V23.99
																					Road Injury	V24.00
																					Road Injury	V24.01
																					Road Injury	V24.02
																					Road Injury	V24.08
																					Road Injury	V24.09
																					Road Injury	V24.10
																					Road Injury	V24.11
																					Road Injury	V24.12
																					Road Injury	V24.18
																					Road Injury	V24.19
																					Road Injury	V24.20
																					Road Injury	V24.21
																					Road Injury	V24.22
																					Road Injury	V24.28
																					Road Injury	V24.29
																					Road Injury	V24.30
																					Road Injury	V24.31
																					Road Injury	V24.32
																					Road Injury	V24.38
																					Road Injury	V24.39
																					Road Injury	V24.40
																					Road Injury	V24.41
																					Road Injury	V24.42
																					Road Injury	V24.48
																					Road Injury	V24.49
																					Road Injury	V24.50
																					Road Injury	V24.51
																					Road Injury	V24.52
																					Road Injury	V24.58
																					Road Injury	V24.59
																					Road Injury	V24.90
																					Road Injury	V24.91
																					Road Injury	V24.92
																					Road Injury	V24.98
																					Road Injury	V24.99
																					Road Injury	V25.00
																					Road Injury	V25.01
																					Road Injury	V25.02
																					Road Injury	V25.08
																					Road Injury	V25.09
																					Road Injury	V25.10
																					Road Injury	V25.11
																					Road Injury	V25.12
																					Road Injury	V25.18
																					Road Injury	V25.19
																					Road Injury	V25.20
																					Road Injury	V25.21
																					Road Injury	V25.22
																					Road Injury	V25.28
																					Road Injury	V25.29
																					Road Injury	V25.30
																					Road Injury	V25.31
																					Road Injury	V25.32
																					Road Injury	V25.38
																					Road Injury	V25.39
																					Road Injury	V25.40
																					Road Injury	V25.41
																					Road Injury	V25.42
																					Road Injury	V25.48
																					Road Injury	V25.49
																					Road Injury	V25.50
																					Road Injury	V25.51
																					Road Injury	V25.52
																					Road Injury	V25.58
																					Road Injury	V25.59
																					Road Injury	V25.90
																					Road Injury	V25.91
																					Road Injury	V25.92
																					Road Injury	V25.98
																					Road Injury	V25.99
																					Road Injury	V26.00
																					Road Injury	V26.01
																					Road Injury	V26.02
																					Road Injury	V26.08
																					Road Injury	V26.09
																					Road Injury	V26.10
																					Road Injury	V26.11
																					Road Injury	V26.12
																					Road Injury	V26.18
																					Road Injury	V26.19
																					Road Injury	V26.20
																					Road Injury	V26.21
																					Road Injury	V26.22
																					Road Injury	V26.28
																					Road Injury	V26.29
																					Road Injury	V26.30
																					Road Injury	V26.31
																					Road Injury	V26.32
																					Road Injury	V26.38
																					Road Injury	V26.39
																					Road Injury	V26.40
																					Road Injury	V26.41
																					Road Injury	V26.42
																					Road Injury	V26.48
																					Road Injury	V26.49
																					Road Injury	V26.50
																					Road Injury	V26.51
																					Road Injury	V26.52
																					Road Injury	V26.58
																					Road Injury	V26.59
																					Road Injury	V26.90
																					Road Injury	V26.91
																					Road Injury	V26.92
																					Road Injury	V26.98
																					Road Injury	V26.99
																					Road Injury	V27.00
																					Road Injury	V27.01
																					Road Injury	V27.02
																					Road Injury	V27.08
																					Road Injury	V27.09
																					Road Injury	V27.10
																					Road Injury	V27.11
																					Road Injury	V27.12
																					Road Injury	V27.18
																					Road Injury	V27.19
																					Road Injury	V27.20
																					Road Injury	V27.21
																					Road Injury	V27.22
																					Road Injury	V27.28
																					Road Injury	V27.29
																					Road Injury	V27.30
																					Road Injury	V27.31
																					Road Injury	V27.32
																					Road Injury	V27.38
																					Road Injury	V27.39
																					Road Injury	V27.40
																					Road Injury	V27.41
																					Road Injury	V27.42
																					Road Injury	V27.48
																					Road Injury	V27.49
																					Road Injury	V27.50
																					Road Injury	V27.51
																					Road Injury	V27.52
																					Road Injury	V27.58
																					Road Injury	V27.59
																					Road Injury	V27.90
																					Road Injury	V27.91
																					Road Injury	V27.92
																					Road Injury	V27.98
																					Road Injury	V27.99
																					Road Injury	V28.00
																					Road Injury	V28.01
																					Road Injury	V28.02
																					Road Injury	V28.08
																					Road Injury	V28.09
																					Road Injury	V28.10
																					Road Injury	V28.11
																					Road Injury	V28.12
																					Road Injury	V28.18
																					Road Injury	V28.19
																					Road Injury	V28.20
																					Road Injury	V28.21
																					Road Injury	V28.22
																					Road Injury	V28.28
																					Road Injury	V28.29
																					Road Injury	V28.30
																					Road Injury	V28.31
																					Road Injury	V28.32
																					Road Injury	V28.38
																					Road Injury	V28.39
																					Road Injury	V28.40
																					Road Injury	V28.41
																					Road Injury	V28.42
																					Road Injury	V28.48
																					Road Injury	V28.49
																					Road Injury	V28.50
																					Road Injury	V28.51
																					Road Injury	V28.52
																					Road Injury	V28.58
																					Road Injury	V28.59
																					Road Injury	V28.90
																					Road Injury	V28.91
																					Road Injury	V28.92
																					Road Injury	V28.98
																					Road Injury	V28.99
																					Road Injury	V29.0
																					Road Injury	V29.1
																					Road Injury	V29.2
																					Road Injury	V29.3
																					Road Injury	V29.4
																					Road Injury	V29.5
																					Road Injury	V29.6
																					Road Injury	V29.8
																					Road Injury	V29.9
																					Road Injury	V30.0
																					Road Injury	V30.1
																					Road Injury	V30.2
																					Road Injury	V30.3
																					Road Injury	V30.4
																					Road Injury	V30.5
																					Road Injury	V30.6
																					Road Injury	V30.7
																					Road Injury	V30.9
																					Road Injury	V31.0
																					Road Injury	V31.1
																					Road Injury	V31.2
																					Road Injury	V31.3
																					Road Injury	V31.4
																					Road Injury	V31.5
																					Road Injury	V31.6
																					Road Injury	V31.7
																					Road Injury	V31.9
																					Road Injury	V32.0
																					Road Injury	V32.1
																					Road Injury	V32.2
																					Road Injury	V32.3
																					Road Injury	V32.4
																					Road Injury	V32.5
																					Road Injury	V32.6
																					Road Injury	V32.7
																					Road Injury	V32.9
																					Road Injury	V33.0
																					Road Injury	V33.1
																					Road Injury	V33.2
																					Road Injury	V33.3
																					Road Injury	V33.4
																					Road Injury	V33.5
																					Road Injury	V33.6
																					Road Injury	V33.7
																					Road Injury	V33.9
																					Road Injury	V34.0
																					Road Injury	V34.1
																					Road Injury	V34.2
																					Road Injury	V34.3
																					Road Injury	V34.4
																					Road Injury	V34.5
																					Road Injury	V34.6
																					Road Injury	V34.7
																					Road Injury	V34.9
																					Road Injury	V35.0
																					Road Injury	V35.1
																					Road Injury	V35.2
																					Road Injury	V35.3
																					Road Injury	V35.4
																					Road Injury	V35.5
																					Road Injury	V35.6
																					Road Injury	V35.7
																					Road Injury	V35.9
																					Road Injury	V36.0
																					Road Injury	V36.1
																					Road Injury	V36.2
																					Road Injury	V36.3
																					Road Injury	V36.4
																					Road Injury	V36.5
																					Road Injury	V36.6
																					Road Injury	V36.7
																					Road Injury	V36.9
																					Road Injury	V37.0
																					Road Injury	V37.1
																					Road Injury	V37.2
																					Road Injury	V37.3
																					Road Injury	V37.4
																					Road Injury	V37.5
																					Road Injury	V37.6
																					Road Injury	V37.7
																					Road Injury	V37.9
																					Road Injury	V38.0
																					Road Injury	V38.1
																					Road Injury	V38.2
																					Road Injury	V38.3
																					Road Injury	V38.4
																					Road Injury	V38.5
																					Road Injury	V38.6
																					Road Injury	V38.7
																					Road Injury	V38.9
																					Road Injury	V39.0
																					Road Injury	V39.1
																					Road Injury	V39.2
																					Road Injury	V39.3
																					Road Injury	V39.4
																					Road Injury	V39.5
																					Road Injury	V39.6
																					Road Injury	V39.8
																					Road Injury	V39.9
																					Road Injury	V40.00
																					Road Injury	V40.01
																					Road Injury	V40.02
																					Road Injury	V40.03
																					Road Injury	V40.08
																					Road Injury	V40.09
																					Road Injury	V40.10
																					Road Injury	V40.11
																					Road Injury	V40.12
																					Road Injury	V40.13
																					Road Injury	V40.18
																					Road Injury	V40.19
																					Road Injury	V40.20
																					Road Injury	V40.21
																					Road Injury	V40.22
																					Road Injury	V40.23
																					Road Injury	V40.28
																					Road Injury	V40.29
																					Road Injury	V40.30
																					Road Injury	V40.31
																					Road Injury	V40.32
																					Road Injury	V40.33
																					Road Injury	V40.38
																					Road Injury	V40.39
																					Road Injury	V40.40
																					Road Injury	V40.41
																					Road Injury	V40.42
																					Road Injury	V40.43
																					Road Injury	V40.48
																					Road Injury	V40.49
																					Road Injury	V40.50
																					Road Injury	V40.51
																					Road Injury	V40.52
																					Road Injury	V40.53
																					Road Injury	V40.58
																					Road Injury	V40.59
																					Road Injury	V40.60
																					Road Injury	V40.61
																					Road Injury	V40.62
																					Road Injury	V40.63
																					Road Injury	V40.68
																					Road Injury	V40.69
																					Road Injury	V40.70
																					Road Injury	V40.71
																					Road Injury	V40.72
																					Road Injury	V40.73
																					Road Injury	V40.78
																					Road Injury	V40.79
																					Road Injury	V40.90
																					Road Injury	V40.91
																					Road Injury	V40.92
																					Road Injury	V40.93
																					Road Injury	V40.98
																					Road Injury	V40.99
																					Road Injury	V41.00
																					Road Injury	V41.01
																					Road Injury	V41.02
																					Road Injury	V41.03
																					Road Injury	V41.08
																					Road Injury	V41.09
																					Road Injury	V41.10
																					Road Injury	V41.11
																					Road Injury	V41.12
																					Road Injury	V41.13
																					Road Injury	V41.18
																					Road Injury	V41.19
																					Road Injury	V41.20
																					Road Injury	V41.21
																					Road Injury	V41.22
																					Road Injury	V41.23
																					Road Injury	V41.28
																					Road Injury	V41.29
																					Road Injury	V41.30
																					Road Injury	V41.31
																					Road Injury	V41.32
																					Road Injury	V41.33
																					Road Injury	V41.38
																					Road Injury	V41.39
																					Road Injury	V41.40
																					Road Injury	V41.41
																					Road Injury	V41.42
																					Road Injury	V41.43
																					Road Injury	V41.48
																					Road Injury	V41.49
																					Road Injury	V41.50
																					Road Injury	V41.51
																					Road Injury	V41.52
																					Road Injury	V41.53
																					Road Injury	V41.58
																					Road Injury	V41.59
																					Road Injury	V41.60
																					Road Injury	V41.61
																					Road Injury	V41.62
																					Road Injury	V41.63
																					Road Injury	V41.68
																					Road Injury	V41.69
																					Road Injury	V41.70
																					Road Injury	V41.71
																					Road Injury	V41.72
																					Road Injury	V41.73
																					Road Injury	V41.78
																					Road Injury	V41.79
																					Road Injury	V41.90
																					Road Injury	V41.91
																					Road Injury	V41.92
																					Road Injury	V41.93
																					Road Injury	V41.98
																					Road Injury	V41.99
																					Road Injury	V42.00
																					Road Injury	V42.01
																					Road Injury	V42.02
																					Road Injury	V42.03
																					Road Injury	V42.08
																					Road Injury	V42.09
																					Road Injury	V42.10
																					Road Injury	V42.11
																					Road Injury	V42.12
																					Road Injury	V42.13
																					Road Injury	V42.18
																					Road Injury	V42.19
																					Road Injury	V42.20
																					Road Injury	V42.21
																					Road Injury	V42.22
																					Road Injury	V42.23
																					Road Injury	V42.28
																					Road Injury	V42.29
																					Road Injury	V42.30
																					Road Injury	V42.31
																					Road Injury	V42.32
																					Road Injury	V42.33
																					Road Injury	V42.38
																					Road Injury	V42.39
																					Road Injury	V42.40
																					Road Injury	V42.41
																					Road Injury	V42.42
																					Road Injury	V42.43
																					Road Injury	V42.48
																					Road Injury	V42.49
																					Road Injury	V42.50
																					Road Injury	V42.51
																					Road Injury	V42.52
																					Road Injury	V42.53
																					Road Injury	V42.58
																					Road Injury	V42.59
																					Road Injury	V42.60
																					Road Injury	V42.61
																					Road Injury	V42.62
																					Road Injury	V42.63
																					Road Injury	V42.68
																					Road Injury	V42.69
																					Road Injury	V42.70
																					Road Injury	V42.71
																					Road Injury	V42.72
																					Road Injury	V42.73
																					Road Injury	V42.78
																					Road Injury	V42.79
																					Road Injury	V42.90
																					Road Injury	V42.91
																					Road Injury	V42.92
																					Road Injury	V42.93
																					Road Injury	V42.98
																					Road Injury	V42.99
																					Road Injury	V43.00
																					Road Injury	V43.01
																					Road Injury	V43.02
																					Road Injury	V43.03
																					Road Injury	V43.08
																					Road Injury	V43.09
																					Road Injury	V43.10
																					Road Injury	V43.11
																					Road Injury	V43.12
																					Road Injury	V43.13
																					Road Injury	V43.18
																					Road Injury	V43.19
																					Road Injury	V43.20
																					Road Injury	V43.21
																					Road Injury	V43.22
																					Road Injury	V43.23
																					Road Injury	V43.28
																					Road Injury	V43.29
																					Road Injury	V43.30
																					Road Injury	V43.31
																					Road Injury	V43.32
																					Road Injury	V43.33
																					Road Injury	V43.38
																					Road Injury	V43.39
																					Road Injury	V43.40
																					Road Injury	V43.41
																					Road Injury	V43.42
																					Road Injury	V43.43
																					Road Injury	V43.48
																					Road Injury	V43.49
																					Road Injury	V43.50
																					Road Injury	V43.51
																					Road Injury	V43.52
																					Road Injury	V43.53
																					Road Injury	V43.58
																					Road Injury	V43.59
																					Road Injury	V43.60
																					Road Injury	V43.61
																					Road Injury	V43.62
																					Road Injury	V43.63
																					Road Injury	V43.68
																					Road Injury	V43.69
																					Road Injury	V43.70
																					Road Injury	V43.71
																					Road Injury	V43.72
																					Road Injury	V43.73
																					Road Injury	V43.78
																					Road Injury	V43.79
																					Road Injury	V43.90
																					Road Injury	V43.91
																					Road Injury	V43.92
																					Road Injury	V43.93
																					Road Injury	V43.98
																					Road Injury	V43.99
																					Road Injury	V44.00
																					Road Injury	V44.01
																					Road Injury	V44.02
																					Road Injury	V44.03
																					Road Injury	V44.08
																					Road Injury	V44.09
																					Road Injury	V44.10
																					Road Injury	V44.11
																					Road Injury	V44.12
																					Road Injury	V44.13
																					Road Injury	V44.18
																					Road Injury	V44.19
																					Road Injury	V44.20
																					Road Injury	V44.21
																					Road Injury	V44.22
																					Road Injury	V44.23
																					Road Injury	V44.28
																					Road Injury	V44.29
																					Road Injury	V44.30
																					Road Injury	V44.31
																					Road Injury	V44.32
																					Road Injury	V44.33
																					Road Injury	V44.38
																					Road Injury	V44.39
																					Road Injury	V44.40
																					Road Injury	V44.41
																					Road Injury	V44.42
																					Road Injury	V44.43
																					Road Injury	V44.48
																					Road Injury	V44.49
																					Road Injury	V44.50
																					Road Injury	V44.51
																					Road Injury	V44.52
																					Road Injury	V44.53
																					Road Injury	V44.58
																					Road Injury	V44.59
																					Road Injury	V44.60
																					Road Injury	V44.61
																					Road Injury	V44.62
																					Road Injury	V44.63
																					Road Injury	V44.68
																					Road Injury	V44.69
																					Road Injury	V44.70
																					Road Injury	V44.71
																					Road Injury	V44.72
																					Road Injury	V44.73
																					Road Injury	V44.78
																					Road Injury	V44.79
																					Road Injury	V44.90
																					Road Injury	V44.91
																					Road Injury	V44.92
																					Road Injury	V44.93
																					Road Injury	V44.98
																					Road Injury	V44.99
																					Road Injury	V45.00
																					Road Injury	V45.01
																					Road Injury	V45.02
																					Road Injury	V45.03
																					Road Injury	V45.08
																					Road Injury	V45.09
																					Road Injury	V45.10
																					Road Injury	V45.11
																					Road Injury	V45.12
																					Road Injury	V45.13
																					Road Injury	V45.18
																					Road Injury	V45.19
																					Road Injury	V45.20
																					Road Injury	V45.21
																					Road Injury	V45.22
																					Road Injury	V45.23
																					Road Injury	V45.28
																					Road Injury	V45.29
																					Road Injury	V45.30
																					Road Injury	V45.31
																					Road Injury	V45.32
																					Road Injury	V45.33
																					Road Injury	V45.38
																					Road Injury	V45.39
																					Road Injury	V45.40
																					Road Injury	V45.41
																					Road Injury	V45.42
																					Road Injury	V45.43
																					Road Injury	V45.48
																					Road Injury	V45.49
																					Road Injury	V45.50
																					Road Injury	V45.51
																					Road Injury	V45.52
																					Road Injury	V45.53
																					Road Injury	V45.58
																					Road Injury	V45.59
																					Road Injury	V45.60
																					Road Injury	V45.61
																					Road Injury	V45.62
																					Road Injury	V45.63
																					Road Injury	V45.68
																					Road Injury	V45.69
																					Road Injury	V45.70
																					Road Injury	V45.71
																					Road Injury	V45.72
																					Road Injury	V45.73
																					Road Injury	V45.78
																					Road Injury	V45.79
																					Road Injury	V45.90
																					Road Injury	V45.91
																					Road Injury	V45.92
																					Road Injury	V45.93
																					Road Injury	V45.98
																					Road Injury	V45.99
																					Road Injury	V46.00
																					Road Injury	V46.01
																					Road Injury	V46.02
																					Road Injury	V46.03
																					Road Injury	V46.08
																					Road Injury	V46.09
																					Road Injury	V46.10
																					Road Injury	V46.11
																					Road Injury	V46.12
																					Road Injury	V46.13
																					Road Injury	V46.18
																					Road Injury	V46.19
																					Road Injury	V46.20
																					Road Injury	V46.21
																					Road Injury	V46.22
																					Road Injury	V46.23
																					Road Injury	V46.28
																					Road Injury	V46.29
																					Road Injury	V46.30
																					Road Injury	V46.31
																					Road Injury	V46.32
																					Road Injury	V46.33
																					Road Injury	V46.38
																					Road Injury	V46.39
																					Road Injury	V46.40
																					Road Injury	V46.41
																					Road Injury	V46.42
																					Road Injury	V46.43
																					Road Injury	V46.48
																					Road Injury	V46.49
																					Road Injury	V46.50
																					Road Injury	V46.51
																					Road Injury	V46.52
																					Road Injury	V46.53
																					Road Injury	V46.58
																					Road Injury	V46.59
																					Road Injury	V46.60
																					Road Injury	V46.61
																					Road Injury	V46.62
																					Road Injury	V46.63
																					Road Injury	V46.68
																					Road Injury	V46.69
																					Road Injury	V46.70
																					Road Injury	V46.71
																					Road Injury	V46.72
																					Road Injury	V46.73
																					Road Injury	V46.78
																					Road Injury	V46.79
																					Road Injury	V46.90
																					Road Injury	V46.91
																					Road Injury	V46.92
																					Road Injury	V46.93
																					Road Injury	V46.98
																					Road Injury	V46.99
																					Road Injury	V47.00
																					Road Injury	V47.01
																					Road Injury	V47.02
																					Road Injury	V47.03
																					Road Injury	V47.08
																					Road Injury	V47.09
																					Road Injury	V47.10
																					Road Injury	V47.11
																					Road Injury	V47.12
																					Road Injury	V47.13
																					Road Injury	V47.18
																					Road Injury	V47.19
																					Road Injury	V47.20
																					Road Injury	V47.21
																					Road Injury	V47.22
																					Road Injury	V47.23
																					Road Injury	V47.28
																					Road Injury	V47.29
																					Road Injury	V47.30
																					Road Injury	V47.31
																					Road Injury	V47.32
																					Road Injury	V47.33
																					Road Injury	V47.38
																					Road Injury	V47.39
																					Road Injury	V47.40
																					Road Injury	V47.41
																					Road Injury	V47.42
																					Road Injury	V47.43
																					Road Injury	V47.48
																					Road Injury	V47.49
																					Road Injury	V47.50
																					Road Injury	V47.51
																					Road Injury	V47.52
																					Road Injury	V47.53
																					Road Injury	V47.58
																					Road Injury	V47.59
																					Road Injury	V47.60
																					Road Injury	V47.61
																					Road Injury	V47.62
																					Road Injury	V47.63
																					Road Injury	V47.68
																					Road Injury	V47.69
																					Road Injury	V47.70
																					Road Injury	V47.71
																					Road Injury	V47.72
																					Road Injury	V47.73
																					Road Injury	V47.78
																					Road Injury	V47.79
																					Road Injury	V47.90
																					Road Injury	V47.91
																					Road Injury	V47.92
																					Road Injury	V47.93
																					Road Injury	V47.98
																					Road Injury	V47.99
																					Road Injury	V48.00
																					Road Injury	V48.01
																					Road Injury	V48.02
																					Road Injury	V48.03
																					Road Injury	V48.08
																					Road Injury	V48.09
																					Road Injury	V48.10
																					Road Injury	V48.11
																					Road Injury	V48.12
																					Road Injury	V48.13
																					Road Injury	V48.18
																					Road Injury	V48.19
																					Road Injury	V48.20
																					Road Injury	V48.21
																					Road Injury	V48.22
																					Road Injury	V48.23
																					Road Injury	V48.28
																					Road Injury	V48.29
																					Road Injury	V48.30
																					Road Injury	V48.31
																					Road Injury	V48.32
																					Road Injury	V48.33
																					Road Injury	V48.38
																					Road Injury	V48.39
																					Road Injury	V48.40
																					Road Injury	V48.41
																					Road Injury	V48.42
																					Road Injury	V48.43
																					Road Injury	V48.48
																					Road Injury	V48.49
																					Road Injury	V48.50
																					Road Injury	V48.51
																					Road Injury	V48.52
																					Road Injury	V48.53
																					Road Injury	V48.58
																					Road Injury	V48.59
																					Road Injury	V48.60
																					Road Injury	V48.61
																					Road Injury	V48.62
																					Road Injury	V48.63
																					Road Injury	V48.68
																					Road Injury	V48.69
																					Road Injury	V48.70
																					Road Injury	V48.71
																					Road Injury	V48.72
																					Road Injury	V48.73
																					Road Injury	V48.78
																					Road Injury	V48.79
																					Road Injury	V48.90
																					Road Injury	V48.91
																					Road Injury	V48.92
																					Road Injury	V48.93
																					Road Injury	V48.98
																					Road Injury	V48.99
																					Road Injury	V49.0
																					Road Injury	V49.1
																					Road Injury	V49.2
																					Road Injury	V49.3
																					Road Injury	V49.4
																					Road Injury	V49.5
																					Road Injury	V49.6
																					Road Injury	V49.8
																					Road Injury	V49.9
																					Road Injury	V50.0
																					Road Injury	V50.1
																					Road Injury	V50.2
																					Road Injury	V50.3
																					Road Injury	V50.4
																					Road Injury	V50.5
																					Road Injury	V50.6
																					Road Injury	V50.7
																					Road Injury	V50.9
																					Road Injury	V51.0
																					Road Injury	V51.1
																					Road Injury	V51.2
																					Road Injury	V51.3
																					Road Injury	V51.4
																					Road Injury	V51.5
																					Road Injury	V51.6
																					Road Injury	V51.7
																					Road Injury	V51.9
																					Road Injury	V52.0
																					Road Injury	V52.1
																					Road Injury	V52.2
																					Road Injury	V52.3
																					Road Injury	V52.4
																					Road Injury	V52.5
																					Road Injury	V52.6
																					Road Injury	V52.7
																					Road Injury	V52.9
																					Road Injury	V53.0
																					Road Injury	V53.1
																					Road Injury	V53.2
																					Road Injury	V53.3
																					Road Injury	V53.4
																					Road Injury	V53.5
																					Road Injury	V53.6
																					Road Injury	V53.7
																					Road Injury	V53.9
																					Road Injury	V54.0
																					Road Injury	V54.1
																					Road Injury	V54.2
																					Road Injury	V54.3
																					Road Injury	V54.4
																					Road Injury	V54.5
																					Road Injury	V54.6
																					Road Injury	V54.7
																					Road Injury	V54.9
																					Road Injury	V55.0
																					Road Injury	V55.1
																					Road Injury	V55.2
																					Road Injury	V55.3
																					Road Injury	V55.4
																					Road Injury	V55.5
																					Road Injury	V55.6
																					Road Injury	V55.7
																					Road Injury	V55.9
																					Road Injury	V56.0
																					Road Injury	V56.1
																					Road Injury	V56.2
																					Road Injury	V56.3
																					Road Injury	V56.4
																					Road Injury	V56.5
																					Road Injury	V56.6
																					Road Injury	V56.7
																					Road Injury	V56.9
																					Road Injury	V57.0
																					Road Injury	V57.1
																					Road Injury	V57.2
																					Road Injury	V57.3
																					Road Injury	V57.4
																					Road Injury	V57.5
																					Road Injury	V57.6
																					Road Injury	V57.7
																					Road Injury	V57.9
																					Road Injury	V58.0
																					Road Injury	V58.1
																					Road Injury	V58.2
																					Road Injury	V58.3
																					Road Injury	V58.4
																					Road Injury	V58.5
																					Road Injury	V58.6
																					Road Injury	V58.7
																					Road Injury	V58.9
																					Road Injury	V59.0
																					Road Injury	V59.1
																					Road Injury	V59.2
																					Road Injury	V59.3
																					Road Injury	V59.4
																					Road Injury	V59.5
																					Road Injury	V59.6
																					Road Injury	V59.8
																					Road Injury	V59.9
																					Road Injury	V60.0
																					Road Injury	V60.1
																					Road Injury	V60.2
																					Road Injury	V60.3
																					Road Injury	V60.4
																					Road Injury	V60.5
																					Road Injury	V60.6
																					Road Injury	V60.7
																					Road Injury	V60.9
																					Road Injury	V61.0
																					Road Injury	V61.1
																					Road Injury	V61.2
																					Road Injury	V61.3
																					Road Injury	V61.4
																					Road Injury	V61.5
																					Road Injury	V61.6
																					Road Injury	V61.7
																					Road Injury	V61.9
																					Road Injury	V62.0
																					Road Injury	V62.1
																					Road Injury	V62.2
																					Road Injury	V62.3
																					Road Injury	V62.4
																					Road Injury	V62.5
																					Road Injury	V62.6
																					Road Injury	V62.7
																					Road Injury	V62.9
																					Road Injury	V63.0
																					Road Injury	V63.1
																					Road Injury	V63.2
																					Road Injury	V63.3
																					Road Injury	V63.4
																					Road Injury	V63.5
																					Road Injury	V63.6
																					Road Injury	V63.7
																					Road Injury	V63.9
																					Road Injury	V64.0
																					Road Injury	V64.1
																					Road Injury	V64.2
																					Road Injury	V64.3
																					Road Injury	V64.4
																					Road Injury	V64.5
																					Road Injury	V64.6
																					Road Injury	V64.7
																					Road Injury	V64.9
																					Road Injury	V65.0
																					Road Injury	V65.1
																					Road Injury	V65.2
																					Road Injury	V65.3
																					Road Injury	V65.4
																					Road Injury	V65.5
																					Road Injury	V65.6
																					Road Injury	V65.7
																					Road Injury	V65.9
																					Road Injury	V66.0
																					Road Injury	V66.1
																					Road Injury	V66.2
																					Road Injury	V66.3
																					Road Injury	V66.4
																					Road Injury	V66.5
																					Road Injury	V66.6
																					Road Injury	V66.7
																					Road Injury	V66.9
																					Road Injury	V67.0
																					Road Injury	V67.1
																					Road Injury	V67.2
																					Road Injury	V67.3
																					Road Injury	V67.4
																					Road Injury	V67.5
																					Road Injury	V67.6
																					Road Injury	V67.7
																					Road Injury	V67.9
																					Road Injury	V68.0
																					Road Injury	V68.1
																					Road Injury	V68.2
																					Road Injury	V68.3
																					Road Injury	V68.4
																					Road Injury	V68.5
																					Road Injury	V68.6
																					Road Injury	V68.7
																					Road Injury	V68.9
																					Road Injury	V69.0
																					Road Injury	V69.1
																					Road Injury	V69.2
																					Road Injury	V69.3
																					Road Injury	V69.4
																					Road Injury	V69.5
																					Road Injury	V69.6
																					Road Injury	V69.8
																					Road Injury	V69.9
																					Road Injury	V70.0
																					Road Injury	V70.1
																					Road Injury	V70.2
																					Road Injury	V70.3
																					Road Injury	V70.4
																					Road Injury	V70.5
																					Road Injury	V70.6
																					Road Injury	V70.7
																					Road Injury	V70.9
																					Road Injury	V71.0
																					Road Injury	V71.1
																					Road Injury	V71.2
																					Road Injury	V71.3
																					Road Injury	V71.4
																					Road Injury	V71.5
																					Road Injury	V71.6
																					Road Injury	V71.7
																					Road Injury	V71.9
																					Road Injury	V72.0
																					Road Injury	V72.1
																					Road Injury	V72.2
																					Road Injury	V72.3
																					Road Injury	V72.4
																					Road Injury	V72.5
																					Road Injury	V72.6
																					Road Injury	V72.7
																					Road Injury	V72.9
																					Road Injury	V73.0
																					Road Injury	V73.1
																					Road Injury	V73.2
																					Road Injury	V73.3
																					Road Injury	V73.4
																					Road Injury	V73.5
																					Road Injury	V73.6
																					Road Injury	V73.7
																					Road Injury	V73.9
																					Road Injury	V74.0
																					Road Injury	V74.1
																					Road Injury	V74.2
																					Road Injury	V74.3
																					Road Injury	V74.4
																					Road Injury	V74.5
																					Road Injury	V74.6
																					Road Injury	V74.7
																					Road Injury	V74.9
																					Road Injury	V75.0
																					Road Injury	V75.1
																					Road Injury	V75.2
																					Road Injury	V75.3
																					Road Injury	V75.4
																					Road Injury	V75.5
																					Road Injury	V75.6
																					Road Injury	V75.7
																					Road Injury	V75.9
																					Road Injury	V76.0
																					Road Injury	V76.1
																					Road Injury	V76.2
																					Road Injury	V76.3
																					Road Injury	V76.4
																					Road Injury	V76.5
																					Road Injury	V76.6
																					Road Injury	V76.7
																					Road Injury	V76.9
																					Road Injury	V77.0
																					Road Injury	V77.1
																					Road Injury	V77.2
																					Road Injury	V77.3
																					Road Injury	V77.4
																					Road Injury	V77.5
																					Road Injury	V77.6
																					Road Injury	V77.7
																					Road Injury	V77.9
																					Road Injury	V78.0
																					Road Injury	V78.1
																					Road Injury	V78.2
																					Road Injury	V78.3
																					Road Injury	V78.4
																					Road Injury	V78.5
																					Road Injury	V78.6
																					Road Injury	V78.7
																					Road Injury	V78.9
																					Road Injury	V79.0
																					Road Injury	V79.1
																					Road Injury	V79.2
																					Road Injury	V79.3
																					Road Injury	V79.4
																					Road Injury	V79.5
																					Road Injury	V79.6
																					Road Injury	V79.8
																					Road Injury	V79.9
																					Road Injury	V80.00
																					Road Injury	V80.01
																					Road Injury	V80.09
																					Road Injury	V80.1
																					Road Injury	V80.2
																					Road Injury	V80.3
																					Road Injury	V80.4
																					Road Injury	V80.5
																					Road Injury	V80.6
																					Road Injury	V80.7
																					Road Injury	V80.8
																					Road Injury	V80.9
																					Road Injury	V81.0
																					Road Injury	V81.1
																					Road Injury	V81.2
																					Road Injury	V81.3
																					Road Injury	V81.4
																					Road Injury	V81.5
																					Road Injury	V81.6
																					Road Injury	V81.7
																					Road Injury	V81.8
																					Road Injury	V81.9
																					Road Injury	V82.0
																					Road Injury	V82.1
																					Road Injury	V82.2
																					Road Injury	V82.3
																					Road Injury	V82.4
																					Road Injury	V82.5
																					Road Injury	V82.6
																					Road Injury	V82.7
																					Road Injury	V82.8
																					Road Injury	V82.9
																					Road Injury	V83.0
																					Road Injury	V83.1
																					Road Injury	V83.2
																					Road Injury	V83.3
																					Road Injury	V83.4
																					Road Injury	V83.5
																					Road Injury	V83.6
																					Road Injury	V83.7
																					Road Injury	V83.9
																					Road Injury	V84.0
																					Road Injury	V84.1
																					Road Injury	V84.2
																					Road Injury	V84.3
																					Road Injury	V84.4
																					Road Injury	V84.5
																					Road Injury	V84.6
																					Road Injury	V84.7
																					Road Injury	V84.9
																					Road Injury	V85.0
																					Road Injury	V85.1
																					Road Injury	V85.2
																					Road Injury	V85.3
																					Road Injury	V85.4
																					Road Injury	V85.5
																					Road Injury	V85.6
																					Road Injury	V85.7
																					Road Injury	V85.9
																					Road Injury	V86.00
																					Road Injury	V86.01
																					Road Injury	V86.02
																					Road Injury	V86.09
																					Road Injury	V86.10
																					Road Injury	V86.11
																					Road Injury	V86.12
																					Road Injury	V86.19
																					Road Injury	V86.20
																					Road Injury	V86.21
																					Road Injury	V86.22
																					Road Injury	V86.29
																					Road Injury	V86.30
																					Road Injury	V86.31
																					Road Injury	V86.32
																					Road Injury	V86.39
																					Road Injury	V86.40
																					Road Injury	V86.41
																					Road Injury	V86.42
																					Road Injury	V86.49
																					Road Injury	V86.50
																					Road Injury	V86.51
																					Road Injury	V86.52
																					Road Injury	V86.59
																					Road Injury	V86.60
																					Road Injury	V86.61
																					Road Injury	V86.62
																					Road Injury	V86.69
																					Road Injury	V86.70
																					Road Injury	V86.71
																					Road Injury	V86.72
																					Road Injury	V86.79
																					Road Injury	V86.90
																					Road Injury	V86.91
																					Road Injury	V86.92
																					Road Injury	V86.99
																					Road Injury	V87.0
																					Road Injury	V87.1
																					Road Injury	V87.2
																					Road Injury	V87.3
																					Road Injury	V87.4
																					Road Injury	V87.5
																					Road Injury	V87.6
																					Road Injury	V87.7
																					Road Injury	V87.8
																					Road Injury	V87.9
																					Road Injury	V88.0
																					Road Injury	V88.1
																					Road Injury	V88.2
																					Road Injury	V88.3
																					Road Injury	V88.4
																					Road Injury	V88.5
																					Road Injury	V88.6
																					Road Injury	V88.7
																					Road Injury	V88.8
																					Road Injury	V88.9
