# Supplementary material for: Time Series Analysis and Forecasting with Automated Machine Learning on a National ICD-10 Database
Source: Int J Environ Res Public Health. 2020 Jul 10;17(14):4979. doi: 10.3390/ijerph17144979 (PMC7400312; doi:10.3390/ijerph17144979)
Supplement: Supplementary file 1 [file ijerph-17-04979-s001.zip › ijerph-836444 - Table S2.xlsx]

## Sheet: Sheet1
Date	Holiday
2008-01-01	New Year's Day
2008-01-02	Day after New Year's Day
2008-02-24	Dragobete *	* traditional Romanian holiday celebrated on February 24th
2008-03-01	Martisor **	** celebration at the beginning of spring, on March 1st in Romania and Moldova
2008-03-08	International Women's Day
2008-03-20	March Equinox
2008-04-27	Orthodox Easter Day
2008-04-28	Orthodox Easter Monday
2008-05-01	Labor Day / May Day
2008-06-01	Children's Day
2008-06-05	Orthodox Ascension Day
2008-06-15	Orthodox Pentecost
2008-06-16	Orthodox Pentecost Monday
2008-06-21	June Solstice
2008-06-26	Flag Day
2008-07-29	National Anthem Day
2008-08-15	St Mary's Day
2008-09-22	September Equinox
2008-10-31	Halloween
2008-12-01	National holiday
2008-12-08	Constitution Day
2008-12-21	December Solstice
2008-12-24	Christmas Eve
2008-12-25	Christmas Day
2008-12-26	Second day of Christmas
2008-12-31	New Year's Eve
2009-01-01	New Year's Day
2009-01-02	Day after New Year's Day
2009-02-24	Dragobete *
2009-03-01	Martisor **
2009-03-08	International Women's Day
2009-03-20	March Equinox
2009-04-19	Orthodox Easter Day
2009-04-20	Orthodox Easter Monday
2009-05-01	Labor Day / May Day
2009-05-28	Orthodox Ascension Day
2009-06-01	Children's Day
2009-06-07	Orthodox Pentecost
2009-06-08	Orthodox Pentecost Monday
2009-06-21	June Solstice
2009-06-26	Flag Day
2009-07-29	National Anthem Day
2009-08-15	St Mary's Day
2009-09-23	September Equinox
2009-10-31	Halloween
2009-12-01	National holiday
2009-12-08	Constitution Day
2009-12-21	December Solstice
2009-12-24	Christmas Eve
2009-12-25	Christmas Day
2009-12-26	Second day of Christmas
2009-12-31	New Year's Eve
2010-01-01	New Year's Day
2010-01-02	Day after New Year's Day
2010-02-24	Dragobete *
2010-03-01	Martisor **
2010-03-08	International Women's Day
2010-03-20	March Equinox
2010-04-04	Orthodox Easter Day
2010-04-05	Orthodox Easter Monday
2010-05-01	Labor Day / May Day
2010-05-02	Mother's Day
2010-05-09	Father's Day
2010-05-13	Orthodox Ascension Day
2010-05-23	Orthodox Pentecost
2010-05-24	Orthodox Pentecost Monday
2010-06-01	Children's Day
2010-06-21	June Solstice
2010-06-26	Flag Day
2010-07-29	National Anthem Day
2010-08-15	St Mary's Day
2010-09-23	September Equinox
2010-10-31	Halloween
2010-12-01	National holiday
2010-12-08	Constitution Day
2010-12-22	December Solstice
2010-12-24	Christmas Eve
2010-12-25	Christmas Day
2010-12-26	Second day of Christmas
2010-12-31	New Year's Eve
2011-01-01	New Year's Day
2011-01-02	Day after New Year's Day
2011-02-24	Dragobete *
2011-03-01	Martisor **
2011-03-08	International Women's Day
2011-03-21	March Equinox
2011-04-24	Orthodox Easter Day
2011-04-25	Orthodox Easter Monday
2011-05-01	Labor Day / May Day
2011-05-01	Mother's Day
2011-05-08	Father's Day
2011-06-01	Children's Day
2011-06-02	Orthodox Ascension Day
2011-06-12	Orthodox Pentecost
2011-06-13	Orthodox Pentecost Monday
2011-06-21	June Solstice
2011-06-26	Flag Day
2011-07-29	National Anthem Day
2011-08-15	St Mary's Day
2011-09-23	September Equinox
2011-10-31	Halloween
2011-12-01	National holiday
2011-12-08	Constitution Day
2011-12-22	December Solstice
2011-12-24	Christmas Eve
2011-12-25	Christmas Day
2011-12-26	Second day of Christmas
2011-12-31	New Year's Eve
2012-01-01	New Year's Day
2012-01-02	Day after New Year's Day
2012-02-24	Dragobete *
2012-03-01	Martisor **
2012-03-08	International Women's Day
2012-03-20	March Equinox
2012-04-15	Orthodox Easter Day
2012-04-16	Orthodox Easter Monday
2012-05-01	Labor Day / May Day
2012-05-06	Mother's Day
2012-05-13	Father's Day
2012-05-24	Orthodox Ascension Day
2012-06-01	Children's Day
2012-06-03	Orthodox Pentecost
2012-06-04	Orthodox Pentecost Monday
2012-06-21	June Solstice
2012-06-26	Flag Day
2012-07-29	National Anthem Day
2012-08-15	St Mary's Day
2012-09-22	September Equinox
2012-10-31	Halloween
2012-11-30	St Andrew's Day
2012-12-01	National holiday
2012-12-08	Constitution Day
2012-12-21	December Solstice
2012-12-24	Christmas Eve
2012-12-25	Christmas Day
2012-12-26	Second day of Christmas
2012-12-31	New Year's Eve
2013-01-01	New Year's Day
2013-01-02	Day after New Year's Day
2013-02-24	Dragobete *
2013-03-01	Martisor **
2013-03-08	International Women's Day
2013-03-20	March Equinox
2013-05-01	Labor Day / May Day
2013-05-02	Public holiday
2013-05-03	Public holiday 2
2013-05-05	Orthodox Easter Day
2013-05-05	Mother's Day
2013-05-06	Orthodox Easter Monday
2013-05-12	Father's Day
2013-06-01	Children's Day
2013-06-13	Orthodox Ascension Day
2013-06-21	June Solstice
2013-06-23	Orthodox Pentecost
2013-06-24	Orthodox Pentecost Monday
2013-06-26	Flag Day
2013-07-29	National Anthem Day
2013-08-15	St Mary's Day
2013-09-22	September Equinox
2013-10-31	Halloween
2013-11-30	St Andrew's Day
2013-12-01	National holiday
2013-12-08	Constitution Day
2013-12-21	December Solstice
2013-12-24	Christmas Eve
2013-12-25	Christmas Day
2013-12-26	Second day of Christmas
2013-12-31	New Year's Eve
2014-01-01	New Year's Day
2014-01-02	Day after New Year's Day
2014-02-24	Dragobete *
2014-03-01	Martisor **
2014-03-08	International Women's Day
2014-03-20	March Equinox
2014-04-20	Orthodox Easter Day
2014-04-21	Orthodox Easter Monday
2014-05-01	Labor Day / May Day
2014-05-04	Mother's Day
2014-05-11	Father's Day
2014-05-29	Orthodox Ascension Day
2014-06-01	Children's Day
2014-06-08	Orthodox Pentecost
2014-06-09	Orthodox Pentecost Monday
2014-06-21	June Solstice
2014-06-26	Flag Day
2014-07-29	National Anthem Day
2014-08-15	St Mary's Day
2014-09-23	September Equinox
2014-10-31	Halloween
2014-11-30	St Andrew's Day
2014-12-01	National holiday
2014-12-08	Constitution Day
2014-12-22	December Solstice
2014-12-24	Christmas Eve
2014-12-25	Christmas Day
2014-12-26	Second day of Christmas
2014-12-31	New Year's Eve
2015-01-01	New Year's Day
2015-01-02	Day after New Year's Day
2015-01-24	Unification Day
2015-02-24	Dragobete *
2015-03-01	Martisor **
2015-03-08	International Women's Day
2015-03-21	March Equinox
2015-04-12	Orthodox Easter Day
2015-04-13	Orthodox Easter Monday
2015-05-01	Labor Day / May Day
2015-05-03	Mother's Day
2015-05-10	Father's Day
2015-05-10	Monarchy Day
2015-05-21	Orthodox Ascension Day
2015-05-31	Orthodox Pentecost
2015-06-01	Orthodox Pentecost Monday
2015-06-01	Children's Day
2015-06-21	June Solstice
2015-06-26	Flag Day
2015-07-29	National Anthem Day
2015-08-15	St Mary's Day
2015-09-23	September Equinox
2015-10-31	Halloween
2015-11-30	St Andrew's Day
2015-12-01	National holiday
2015-12-08	Constitution Day
2015-12-22	December Solstice
2015-12-24	Christmas Eve
2015-12-25	Christmas Day
2015-12-26	Second day of Christmas
2015-12-31	New Year's Eve
2016-01-01	New Year's Day
2016-01-02	Day after New Year's Day
2016-01-24	Unification Day
2016-02-19	Constantin Brancusi Day
2016-02-24	Dragobete *
2016-03-01	Martisor **
2016-03-08	International Women's Day
2016-03-20	March Equinox
2016-05-01	Labor Day / May Day
2016-05-01	Orthodox Easter Day
2016-05-01	Mother's Day
2016-05-02	Orthodox Easter Monday
2016-05-08	Father's Day
2016-05-10	Monarchy Day
2016-06-01	Children's Day
2016-06-09	Orthodox Ascension Day
2016-06-19	Orthodox Pentecost
2016-06-20	Orthodox Pentecost Monday
2016-06-21	June Solstice
2016-06-26	Flag Day
2016-07-29	National Anthem Day
2016-08-15	St Mary's Day
2016-09-22	September Equinox
2016-10-31	Halloween
2016-11-30	St Andrew's Day
2016-12-01	National holiday
2016-12-02	Extra Bridge Holiday
2016-12-08	Constitution Day
2016-12-21	December Solstice
2016-12-24	Christmas Eve
2016-12-25	Christmas Day
2016-12-26	Second day of Christmas
2016-12-31	New Year's Eve
2017-01-01	New Year's Day
2017-01-02	Day after New Year's Day
2017-01-24	Unification Day
2017-02-19	Constantin Brancusi Day
2017-02-24	Dragobete *
2017-03-01	Martisor **
2017-03-08	International Women's Day
2017-03-20	March Equinox
2017-04-16	Orthodox Easter Day
2017-04-17	Orthodox Easter Monday
2017-05-01	Labor Day / May Day
2017-05-07	Mother's Day
2017-05-10	Monarchy Day
2017-05-14	Father's Day
2017-05-25	Orthodox Ascension Day
2017-06-01	Children's Day
2017-06-02	Children's Day (bridge holiday)
2017-06-04	Orthodox Pentecost
2017-06-05	Orthodox Pentecost Monday
2017-06-21	June Solstice
2017-06-26	Flag Day
2017-07-29	National Anthem Day
2017-08-15	St Mary's Day
2017-09-22	September Equinox
2017-10-31	Halloween
2017-11-30	St Andrew's Day
2017-12-01	National holiday
2017-12-08	Constitution Day
2017-12-21	December Solstice
2017-12-24	Christmas Eve
2017-12-25	Christmas Day
2017-12-26	Second day of Christmas
2017-12-31	New Year's Eve
2018-01-01	New Year's Day
2018-01-02	Day after New Year's Day
2018-01-24	Unification Day
2018-02-19	Constantin Brancusi Day
2018-02-24	Dragobete *
2018-03-01	Martisor **
2018-03-08	International Women's Day
2018-03-20	March Equinox
2018-04-06	Orthodox Good Friday
2018-04-08	Orthodox Easter Day
2018-04-09	Orthodox Easter Monday
2018-05-01	Labor Day / May Day
2018-05-06	Mother's Day
2018-05-10	Monarchy Day
2018-05-13	Father's Day
2018-05-17	Orthodox Ascension Day
2018-05-27	Orthodox Pentecost
2018-05-28	Orthodox Pentecost Monday
2018-06-01	Children's Day
2018-06-21	June Solstice
2018-06-26	Flag Day
2018-07-29	National Anthem Day
2018-08-15	St Mary's Day
2018-09-23	September Equinox
2018-10-31	Halloween
2018-11-30	St Andrew's Day
2018-12-01	National holiday
2018-12-08	Constitution Day
2018-12-22	December Solstice
2018-12-24	Christmas Eve
2018-12-25	Christmas Day
2018-12-26	Second day of Christmas
2018-12-31	New Year's Eve
2019-01-01	New Year's Day
2019-01-02	Day after New Year's Day
2019-01-24	Unification Day
2019-02-19	Constantin Brancusi Day
2019-02-24	Dragobete *
2019-03-01	Martisor **
2019-03-08	International Women's Day
2019-03-20	March Equinox
2019-04-26	Orthodox Good Friday
2019-04-28	Orthodox Easter Day
2019-04-29	Orthodox Easter Monday
2019-04-30	Public holiday
2019-05-01	Labor Day / May Day
2019-05-05	Mother's Day
2019-05-10	Monarchy Day
2019-05-12	Father's Day
2019-06-01	Children's Day
2019-06-06	Orthodox Ascension Day
2019-06-16	Orthodox Pentecost
2019-06-17	Orthodox Pentecost Monday
2019-06-21	June Solstice
2019-06-26	Flag Day
2019-07-29	National Anthem Day
2019-08-15	St Mary's Day
2019-08-16	St Mary's Day Holiday
2019-09-23	September Equinox
2019-10-31	Halloween
2019-11-30	St Andrew's Day
2019-12-01	National holiday
2019-12-08	Constitution Day
2019-12-22	December Solstice
2019-12-24	Christmas Eve
2019-12-25	Christmas Day
2019-12-26	Second day of Christmas
2020-12-31	New Year's Eve
2020-01-01	New Year's Day
2020-01-02	Day after New Year's Day
2020-01-24	Unification Day
2020-02-19	Constantin Brancusi Day
2020-02-24	Dragobete *
2020-03-01	Martisor **
2020-03-08	International Women's Day
2020-03-20	March Equinox
2020-04-17	Orthodox Good Friday
2020-04-19	Orthodox Easter Day
2020-04-20	Orthodox Easter Monday
2020-05-01	Labor Day / May Day
2020-05-03	Mother's Day
2020-05-10	Father's Day
2020-05-10	Monarchy Day
2020-05-28	Orthodox Ascension Day
2020-06-01	Children's Day
2020-06-07	Orthodox Pentecost
2020-06-08	Orthodox Pentecost Monday
2020-06-21	June Solstice
2020-06-26	Flag Day
2020-07-29	National Anthem Day
2020-08-15	St Mary's Day
2020-09-22	September Equinox
2020-10-31	Halloween
2020-11-30	St Andrew's Day
2020-12-01	National holiday
2020-12-08	Constitution Day
2020-12-21	December Solstice
2020-12-24	Christmas Eve
2020-12-25	Christmas Day
2020-12-26	Second day of Christmas
2020-12-31	New Year's Eve
